# Supplementary material for: Discovery of proangiogenic CD44+mesenchymal cancer stem cells in an acute myeloid leukemia patient’s bone marrow
Source: Springer Nature journal article supplement (doi:10.1186/s13045-020-00899-x), 2020-06-03
Supplement: MOESM1 [file 18046934]

# Discovery of Proangiogenic CD44+Mesenchymal Cancer Stem Cells in an Acute Myeloid Leukemia Patient's Bone Marrow

Authors:

Huynh Cao<sup>1\*</sup>, Jeffrey Xiao<sup>2\*</sup>, Mark E. Reeves<sup>1</sup>, Kimberly Payne<sup>3</sup>, Chien Shing Chen<sup>1</sup>, David J. Baylink<sup>2</sup>, Guido Marcucci<sup>4</sup>, Yi Xu<sup>1,2@</sup>

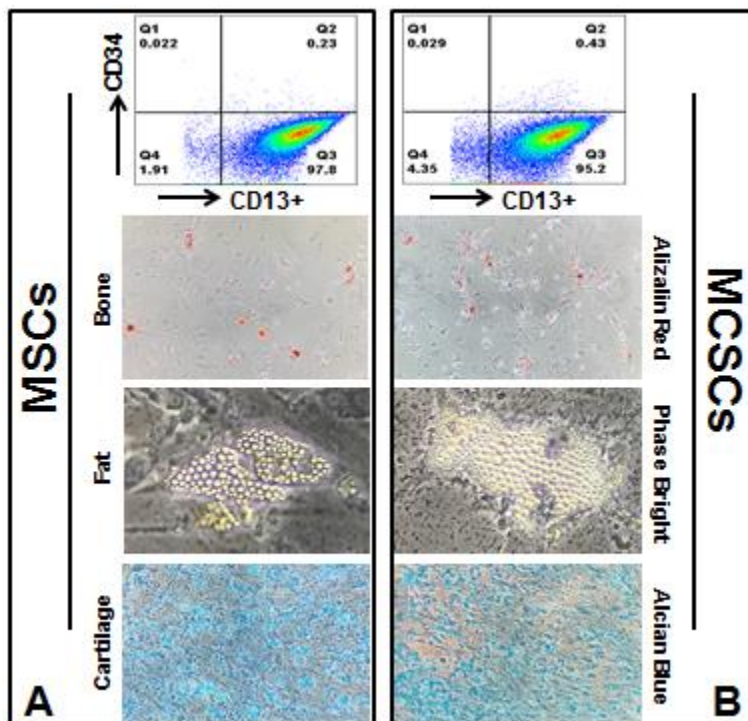

**Supplementary Figure.1: There is no significant difference in differentiation capabilities of P4 MSCs and P4 MCSCs during *ex vivo* cultures.**

**A)** MSCs Panel: FACS plot of CD34-CD13+MSCs, which differentiated into bone (Alizalin staining), fat (phase bright), and cartilage (Alcian blue staining).

**B)** MCSCs Panel: FACS plot of CD34-CD13+MCSCs, which differentiated into bone (Alizalin staining), fat (phase bright), and cartilage (Alcian blue staining).

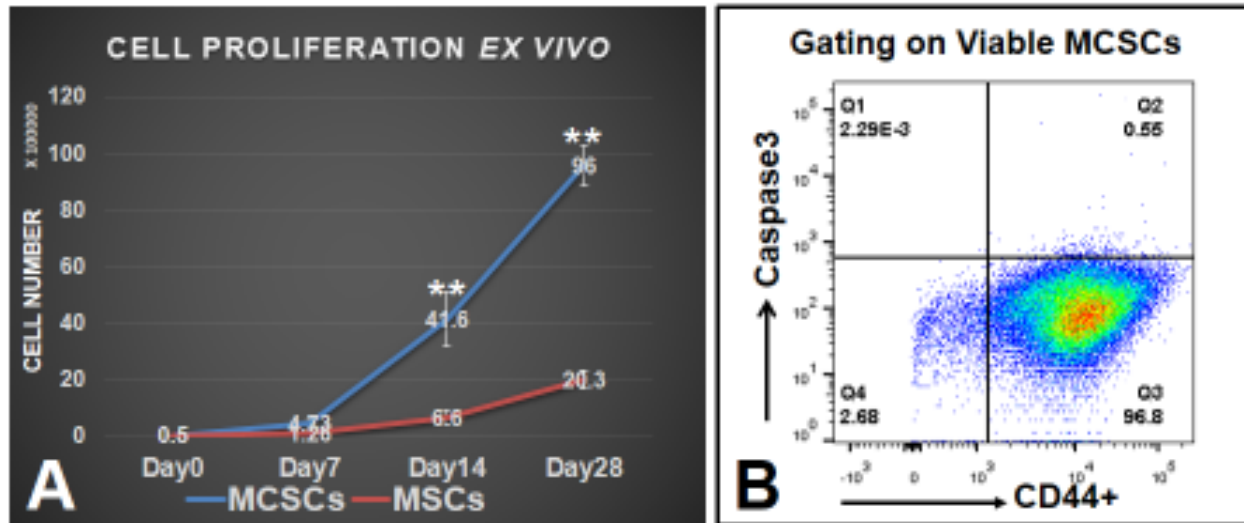

**Supplementary Figure 2: Comparison of Cell Proliferation of MSCs and MCSCs.**

**A)** The P10 MCSCs were found to proliferate much faster than P10 MSCs. \*\* P<0.01;

**B)** These rapidly proliferating MCSCs do not express cleaved Caspase3 (Cell Signaling Technology, Cat#9664S) and continue to express strong CD44+;

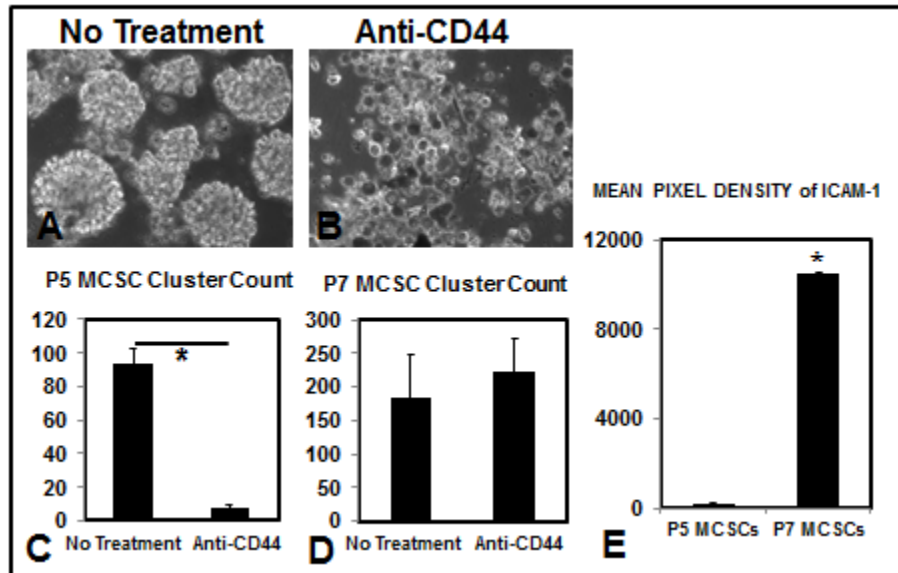

**Supplementary Figure.3: Anti-CD44 monoclonal antibodies inhibited the cluster formation and proliferation of P5 MCSCs.**

*A)* Phase bright images of floating clusters from P5 MCSCs without treatment.

*B)* Phase bright images of floating cells from P5 MCSCs with treatment of anti-CD44.

*C)* Aggregate cluster count data from P5 MCSCs treated with anti-CD44 or without treatment.

*D)* Aggregate cluster count data from P7 MCSCs treated with anti-CD44 or without treatment.

Where applicable, data are means  $\pm$  SEM from each group and were analyzed by Student t-test.

\* $P < 0.05$ ;  $N = 3$ .

*E)* Proteome comparison (mean pixel density) of ICAM-1 between supernatants from P7 MCSC and P5 MCSC cultures. \* $P < 0.05$
