# Supplementary material for: Discovery of proangiogenic CD44+mesenchymal cancer stem cells in an acute myeloid leukemia patient’s bone marrow
Source: Springer Nature journal article supplement (doi:10.1186/s13045-020-00899-x), 2020-06-03
Supplement: MOESM2 [file 18046934]

# **Discovery of Proangiogenic CD44+Mesenchymal Cancer Stem Cells in an Acute Myeloid Leukemia Patient's Bone Marrow**

## **Authors:**

Huynh Cao<sup>1\*</sup>, Jeffrey Xiao<sup>2\*</sup>, Mark E. Reeves<sup>1</sup>, Kimberly Payne<sup>3</sup>, Chien Shing Chen<sup>1</sup>, David J. Baylink<sup>2</sup>, Guido Marcucci<sup>4</sup>, Yi Xu<sup>1, 2@</sup>

## **Materials and Methods**

### **Human samples**

The AML BM sample was obtained from a donor with informed consent and approved by the Institutional Review Board at the Loma Linda University Health.

### **Isolation and *ex vivo* culture of MSCs and MCSCs**

The AML BM sample was incubated with ACK Lysing Buffer (Catalog# A1049201, Thermo Fisher Scientific) to lyse red blood cells (RBCs). Isolation of MSCs and differentiation assays were performed according to the previous report [1]. Instead of discarding the non-adherent floating cells, we transferred the floating cells to a new 24-well plate for continuous culture for an additional 2 weeks to allow a secondary wave of cells (MCSCs) to attach to the plastic bottom of the plate. The STEMdiff™ Mesenchymal Progenitor Kit (Catalog # 05240 STEMCELLTECHNOLOGIES) was used as the culture medium. Medium change was performed every 2-3 days for both MSCs and MCSCs. Cells were passaged when reaching 80 - 90% confluence. BrdU cell proliferation assay was performed according to the manufacturer's protocol (Invitrogen™ B23151). For co-cultures, MCSCs and MSCs were mixed with the MOLM-14 AML

cell line (ATCC), genetically modified to express GFP (GFP-MOLM-14; manuscript in submission).

### **Cluster-forming Assay**

The floating MCSC or MSC cells were re-plated at  $10^5$  cells/mL in 24-well plates. Cell clusters were counted after 2 days, and processed for flow cytometry (FACS) assay of biomarkers (detailed protocols of FACS provided upon request).

### **Proteomics and Blotting Analysis**

The Human XL Cytokine Array Kit (Catalog # ARY022B, R&D) was used according to manufacturer's procedures and exposed to X-ray film. Profiles of mean spot pixel density were created using a transmission-mode scanner and image analysis software.

1. Poliseti, N., et al., *Isolation, characterization and differentiation potential of rat bone marrow stromal cells*. Neurol India, 2010. **58**(2): p. 201-8.
